# Supplementary material
Source: PubMed Central journal article supplement (PMC2685190)
Supplement: NIHMS64210-supplement-supplemental.pdf [file NIHMS64210-supplement-supplemental.pdf]

## **Pore region of TRPV3 ion channel is specifically required for heat-activation**

Jörg Grandl, Hongzhen Hu, Michael Bandell, Badry Bursulaya, Manuela Schmidt, Matt Petrus and Ardem Patapoutian

## Supplementary Figure 1

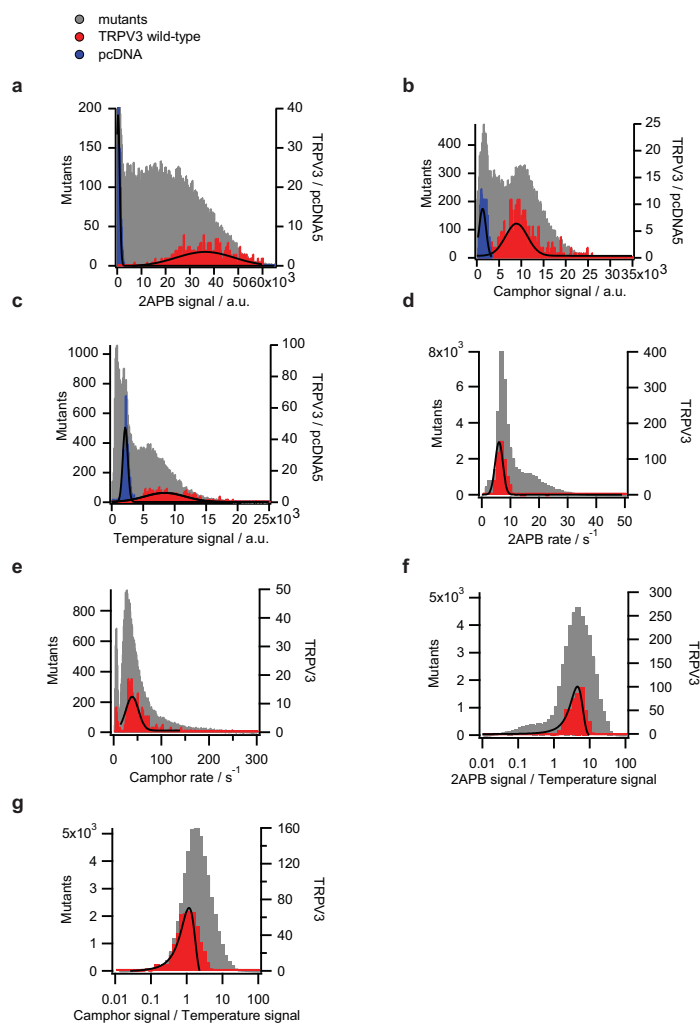

Supplementary Figure 1: Histograms of primary screen

a-c, Histograms of collected data for maximal responses to 2APB (a), camphor (b) and temperature (c) for all clones (grey), TRPV3 (red) and pcDNA (blue).

d-g, Histograms of collected data for rates of signal increase for 2APB (d), camphor (e) and ratios of maximal responses for 2APB/temperature (f) and camphor/temperature (g). Black lines are Gaussian fits to histograms.

## Supplementary Figure 2

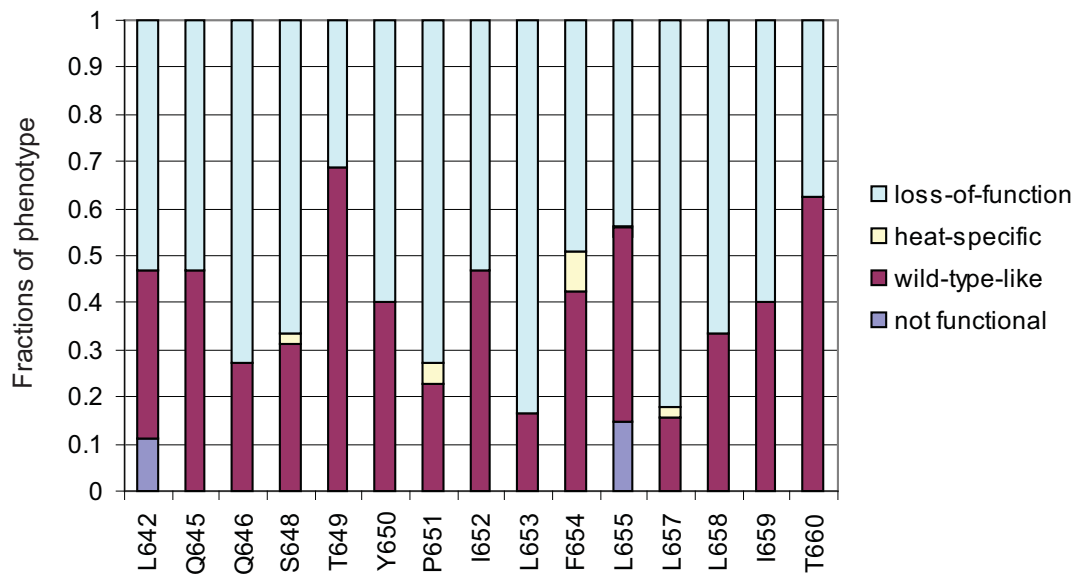

### Supplementary Figure 2: Detailed screen in mouse TRPV3

Fractions of phenotypes observed in single point-mutation screen for mouse TRPV3 resulting from responses to heat, 30  $\mu$ M 2APB and 1.75 mM camphor. The total number of tested clones was 45 for each residue. Note, that the numbers are biased by the degeneration of the genetic code, e.g changes into serine are more frequent than for example mutations to methionine.

## Supplementary Figure 3

a

|        |                                                                                  |                                                              |
|--------|----------------------------------------------------------------------------------|--------------------------------------------------------------|
|        |                                                                                  | domain V                                                     |
| mTRPV3 | MIQKVI <del>LDV</del> LK <del>FLFVYILFLLGFGVALASLIE</del> KCSKDKKDCSS-----       | 620                                                          |
| rTRPV1 | MIEKMILRDLCRFMFVYL <del>VFLFGFSTAVVT</del> LIEDGKNSLPMES---TPHKCRGSACKP-GNS      | 610                                                          |
| hTRPV2 | MIQKVI <del>LDL</del> LRFLLIYLVFLFGFAVALVSLSQEAWRPEAPTGNATESVQPMEGQEDEGNGAQ      | 568                                                          |
| rTRPV2 | MIQKVI <del>LDL</del> LRFLLIYLVFLFGFAVALVSLSREARSPKAPEDNNSTVTEQPTVGQEEEP--AP     | 568                                                          |
| rTRPV4 | MIQKILFKDLRFLRLLVYLLFMIGYASALVTLNPNCTNMKVCNEDQSNCTVPSYPACRDSE----                | 645                                                          |
| mTRPV6 | MIQKMIFGDL <del>MRFCW</del> LMAVVILGFASAFYIIFQTE <del>DPDEL</del> GHFY-----      | 522                                                          |
| xTRPV3 | ----VILNDVLKFLFVYILFLLGFGVALASLLENCE-DGEECQ-----S                                | 477                                                          |
|        |                                                                                  | domain I<br>domain II<br>domain III<br>domain IV<br>domain V |
| mTRPV3 | YGSE <del>SDAVLELFKLLTGLGDLNIQQNSTYPIILFLRLITTYVILTFVLLI</del> NMLIALMGETVENVSKE | 687                                                          |
| rTRPV1 | YNSLYSTCLELFKFTIGMGDLEFTENYDFKAVFIILLLAYVILTYILLLNMLIALMGETVNKIAQE               | 677                                                          |
| hTRPV2 | YRGILEASLELFKFTIGMGELAFQEQLHFRGMVLLLLLAYVLLTYILLLNMLIALMSETVNSVATD               | 635                                                          |
| rTRPV2 | YRSILDASLELFKFTIGMGELAFQEQLRFRGVLLLLLAYVLLTYVLLLNMLIALMSETVNHVADN                | 635                                                          |
| rTRPV4 | --TFSAFLLDLFKLTIGMGDLEMLSSAKYPVVFILLLVTYIILTFVLLLNMLIALMGETVGVQSKE               | 712                                                          |
| mTRPV6 | --DYPMALFSTFELFLTIIDGPANYD <del>VDL</del> PFMYSVTYAAFAIATLLMLNLLIAMMGDTHWRVAHE   | 589                                                          |
| xTRPV3 | ---LSTALELFELTIGLRGLEMDKPKYPVLFLLITFVILTFVLLLNMLIALMGETVEKISQE                   | 544                                                          |

b

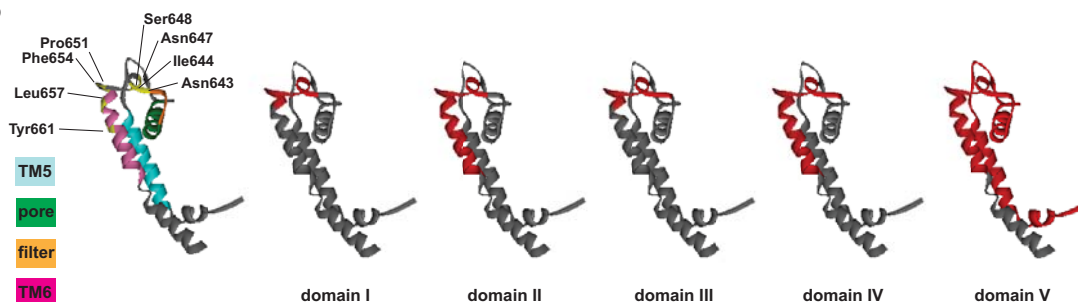

### Supplementary Figure 3: Chimeric constructs

a, Alignment of amino-acid sequences of TRPV channels used for constructing chimeric channels (Supplementary Table 3). Red bars indicate positions of domains (I-V) that were exchanged for different constructs. Abbreviations are h: human, m: mouse, r: rat, x: xenopus. Colours in the sequence of TRPV3 indicate locations of TM5 (blue), pore region (green), selectivity filter (orange), TM6 (pink) and identified point-mutations (yellow).

b, Structural models of one subunit with colours corresponding to the alignment.

### Supplementary Table 1: mutations and EC<sub>50</sub> values of confirmed hits

Point mutations of 15 confirmed hits and their respective EC<sub>50</sub>-values for activation by 2APB and camphor. Mutations that were individually engineered are shown in bold. Errors are s.d., n=15 for wild-type TRPV3 and n=3 for mutants.

| Mutations                                                   | EC <sub>50</sub> (2APB) / $\mu$ M | EC <sub>50</sub> (camphor) / mM |
|-------------------------------------------------------------|-----------------------------------|---------------------------------|
| TRPV3 wild-type                                             | 8.7 $\pm$ 2.7                     | 1.4 $\pm$ 0.2                   |
| Thr17Ser, Ala302Val, <b>Tyr461Phe</b>                       | 5.3                               | 1.1                             |
| Asn79His, Ala245Val, <b>Met440Val</b>                       | 12.4                              | 1.6                             |
| <b>Asn647Tyr</b>                                            | 13.4                              | 1.4                             |
| Ile595Phe, <b>Leu657Ile</b>                                 | 6.8                               | 1.0                             |
| Ile289Thr, <b>Lys434Met</b> , <b>Leu670Phe</b> , Phe780Leu  | 14.0                              | 1.9                             |
| Ala32Glu, Ser77Pro, Ile204Asn, <b>Thr660Ser</b> , Met717Val | 12.3                              | 1.8                             |
| Tyr409His, <b>Asn643Ser</b> , Leu720Pro                     | 10.8                              | 1.5                             |
| Ile186Glu, Asn220Ser, <b>Tyr461Phe</b> , Phe489Ser          | 6.1                               | 1.4                             |
| Ile123Phe, <b>Ile453Asn</b> , Ile765Thr                     | 11.0                              | 1.4                             |
| Gln114Arg, Ile289Val, Thr397Ser                             | 11.3                              | 1.6                             |
| Lys358Glu                                                   | 10.6                              | 1.3                             |
| Asn71Thr, Asn197Ser, Lys774Asn                              | 8.3                               | 1.3                             |
| <b>Ile644Ser</b>                                            | 5.1                               | 1.1                             |
| <b>Tyr451Asn</b> , <b>Tyr661Cys</b>                         | 5.6                               | 1.3                             |
| <b>Phe445Ile</b> , Trp481Arg                                | 6.6                               | 1.6                             |

**Supplementary Table 2: additional point mutations in mouse TRPV3**

Sequencing results for single-point mutations that specifically affect heat-activation in mouse TRPV3.

| <b>Position</b> | <b>Mutation</b> |
|-----------------|-----------------|
| Ser648          | Ile             |
| Pro651          | Ala             |
| Phe654          | Ser, Lys        |
| Leu657          | Glu             |

**Supplementary Table 3: point mutations in xenopus TRPV3**

Sequencing results for single-point mutations that specifically affect heat-activation in xenopus TRPV3.

| <b>Position</b> | <b>Mutation</b>                             |
|-----------------|---------------------------------------------|
| Glu638          | His, Lys, Phe                               |
| Met639          | Ala, Arg, Glu, Gly, Lys, Ser, Thr, Trp, Val |
| Asp640          | Leu, Lys, Tyr, Val                          |
| Lys641          | Pro                                         |
| Asp642          | Met, Pro, Tyr                               |
| Pro643          | Leu                                         |

### Supplementary Table 4: chimeras

Chimeras and their tested responses to stimulation by compounds (2APB, camphor, THC or capsaicin) and heat. Chimeras are ordered for constructs that were aimed to investigate necessity (1) or sufficiency (2) of the replaced domain and named with the insert first and the background second. Species are abbreviated h: human, m: mouse, r: rat, x: xenopus. Numbers indicate inserted fragment as illustrated in Supplementary Figure 3.

| Chimera      | Compound tested    | Compound response  | Heat response |
|--------------|--------------------|--------------------|---------------|
| 1. rV1mV3-II | 2APB, camphor      | EC50 shifted       | reduced       |
| hV2mV3-I     | 2APB, camphor      | EC50 shifted       | no            |
| hV2mV3-II    | 2APB, camphor      | like mV3 wild-type | no            |
| rV2mV3-II    | 2APB, camphor, THC | EC50 shifted       | no            |
| rV4mV3-II    | 2APB, camphor      | EC50 shifted       | no            |
| mV6mV3-I     | 2APB, camphor      | no response        | no            |
| mV6mV3-II    | 2APB, camphor      | no response        | no            |
| mV6mV3-III   | 2APB, camphor      | no response        | no            |
| mV6mV3-IV    | 2APB, camphor      | no response        | no            |
| mC3mV3-II    | 2APB, camphor      | no response        | no            |
| xV3mV3-II    | 2APB, camphor      | no response        | no            |
| 2. mV3hV2-I  | 2APB, THC          | no response        | no            |
| mV3hV2-II    | 2APB, THC          | no response        | no            |
| mV3hV2-V     | 2APB, camphor      | no response        | no            |
